# Supplementary material for: Perioperative Care of Children with Severe Neurological Impairment and Neuromuscular Scoliosis—A Practical Pathway to Optimize Peri-Operative Health and Guide Decision Making
Source: J Clin Med. 2022 Nov 16;11(22):6769. doi: 10.3390/jcm11226769 (PMC9696380; doi:10.3390/jcm11226769)
Supplement: Supplementary file 1 [file jcm-11-06769-s001.zip › File S1 Letter to parents Submission.pdf]

**File S1 – Letter to parents / carer and primary team proforma.** This File shows the template used for the letter for the parents.

*Dear Parent of X,*

***Pre-operative Medical Management Plan***

*This plan is to start in the two-week period prior to X's orthopaedic surgery. You will have the prescriptions for the medications at home with you so that X can start the medications when you have a date for surgery.*

**Gabapentin**

*This will help manage pain and reduce muscle spasm after the surgery. Start this medication in the two weeks prior to surgery.*

- *Week one 100 mg orally three times a day orally/PEG/PEJ*
- *Week two 200 mg orally three times a day orally/PEG/PEJ*

*This should continue during the admission for the surgery and into the post-operative period and can be weaned 4-6 weeks after surgery.*

**Anti-reflux medication**

*Surgery can be stressful and make reflux worse. Fasting and the medications used to manage pain after surgery can also make reflux worse. This is a preventative measure to control reflux. Start this medication in the two weeks prior to surgery.*

- *Omeprazole 10-20 mg once a day orally/PEG/PEJ, or*
- *Esomeprazole 10-20 mg once a day orally/PEG/PEJ*

*This should continue during the admission for the surgery and can be ceased at time of discharge.*

**Bowel Care**

*Constipation is very common after surgery. In the days leading up to the surgery, management of constipation is important*

- *Microlax<sup>®</sup> enema PR one to two days prior to surgery*
- *Increase in lactulose/Movicol<sup>®</sup>/Osmolax<sup>®</sup> in the week prior to surgery*

**Nasogastric tube**

*Many children with cerebral palsy/physical disability/Rett's syndrome manage their oral diet well when they are well. After surgery, both pain and medication can make children sleepy, can make swallowing more difficult. It is suggested that a nasogastric is inserted whilst X is asleep during the surgery. It will help ensure usual medications can be given, fluids and feeds can be started, pain medications can also be given, and X will not be dependent on an intravenous drip. If the tube is not needed, it is very easy to remove.*

*Yours sincerely,*
