# Supplementary material for: Perioperative Care of Children with Severe Neurological Impairment and Neuromuscular Scoliosis—A Practical Pathway to Optimize Peri-Operative Health and Guide Decision Making
Source: J Clin Med. 2022 Nov 16;11(22):6769. doi: 10.3390/jcm11226769 (PMC9696380; doi:10.3390/jcm11226769)
Supplement: Supplementary file 1 [file jcm-11-06769-s001.zip › Table S1 - Meeting proforma Submission.pdf]

**Figure S1 – Meeting proforma.** This shows the template used in the Neuromuscular Scoliosis Multidisciplinary Meeting (with details from the Clinic below).

**Case Conference  
Neuromuscular Scoliosis Combined Clinical Meeting**

|                                                               |
|---------------------------------------------------------------|
| <i>Date</i>                                                   |
|                                                               |
| <b>Participants</b>                                           |
| <i>Names of attendees</i>                                     |
|                                                               |
| <b>Has consent been obtained from the patient/family? YES</b> |
|                                                               |
| <b>Outcome of Medical Scoliosis Clinic</b>                    |
| Further investigations required                               |
| Recommendation – suitable vs not suitable for surgery         |
| Nutritional bloods                                            |
| Elective PICU admission post-op recommended                   |
|                                                               |
| <b>Discussion Notes and Plan</b>                              |
|                                                               |
|                                                               |
| <b>Medications changes since clinic</b>                       |
|                                                               |
| <b>Recent bloods</b> <i>date</i>                              |
| <b>Ferritin</b> ug/L                                          |
| <b>Hb</b> g/L                                                 |
| <b>PCO2</b> mmHg                                              |
|                                                               |
| <b>Additional pre-operative investigations/assessments</b>    |
|                                                               |
| <b>Pre-operative PICU review – Yes / No</b>                   |
|                                                               |
| <b>Pre-operative plan</b>                                     |
|                                                               |
| <b>Nasogastric tube intra-operatively – Yes / No</b>          |
|                                                               |
| <b>Elective PICU admission post-op recommended – Yes / No</b> |
|                                                               |
| <b>Radiology reviewed</b>                                     |
|                                                               |
| <b>Duration of discussion</b>                                 |

**Information proforma from the Clinic**

|                                  |  |
|----------------------------------|--|
| <b>Name</b>                      |  |
| <b>MRN</b>                       |  |
| Date of Birth                    |  |
| Date reviewed in Clinic          |  |
| Attended Clinic with             |  |
| Paediatrician                    |  |
| Scoliosis surgeon                |  |
| Scoliosis Curve (Radiology date) |  |
| Orthopaedic Surgical Plan        |  |

**Summary of Medical Review**

|                           |                                                                                                                                                                                                                                                                                                                                                                                                                                                                     |
|---------------------------|---------------------------------------------------------------------------------------------------------------------------------------------------------------------------------------------------------------------------------------------------------------------------------------------------------------------------------------------------------------------------------------------------------------------------------------------------------------------|
| <b>Diagnosis</b>          |                                                                                                                                                                                                                                                                                                                                                                                                                                                                     |
| MRI/Genetic               |                                                                                                                                                                                                                                                                                                                                                                                                                                                                     |
| Problem list              |                                                                                                                                                                                                                                                                                                                                                                                                                                                                     |
| Current medications       |                                                                                                                                                                                                                                                                                                                                                                                                                                                                     |
| Current weight            |                                                                                                                                                                                                                                                                                                                                                                                                                                                                     |
| <b>COVID</b>              | Infection: Yes / No<br>Date:<br>Immunizations status:<br>Child/adolescent:<br>Family/Carers:                                                                                                                                                                                                                                                                                                                                                                        |
| <b>Influenza</b>          | Immunizations status:                                                                                                                                                                                                                                                                                                                                                                                                                                               |
| <b>Respiratory Status</b> | <b>Baseline</b><br>Chronic Lung Disease – prematurity:<br>Suppurative lung disease:<br>Chronic cough:<br>Aspiration: Primary/Secondary<br>Vomit:<br>Reflux:<br>Asthma:<br><br><b>Sleep history</b><br>Snoring:<br>Apnoea:<br>OSA:<br>Hypoventilation:<br><br>CXR:<br>Chest CT scan:<br>Sputum culture:<br>VFSS:<br>Oximetry:<br>Sleep Study:<br><br><b>Function</b><br>Cough:<br>Strength<br>Effective<br><br>Lung function tests:<br>Secretions/Drooling: Yes / No |

|                                                                                |                                                                                                                                                                                                                                                                                                                                |
|--------------------------------------------------------------------------------|--------------------------------------------------------------------------------------------------------------------------------------------------------------------------------------------------------------------------------------------------------------------------------------------------------------------------------|
|                                                                                | <b>Current Management</b><br>Home chest physiotherapy regime:<br>Home suction: Yes / No<br>Home oxygen: Yes / No<br>Home NPA: Yes / No<br>Home APAP/CPAP/BiPAP/NONE:<br><br>Respiratory illnesses last 12 months:<br>Number of respiratory admissions last 12 months:<br>Typical Mx for respiratory illness/duration/recovery: |
| <b>Previous admission to PICU and management</b>                               | Yes / No<br>HiFlow: Yes / No<br>CPAP: Yes / No<br>BiPAP: Yes / No<br>Intubation: Yes / No<br>Number of admissions to PICU<br>Elective admission post-surgery: Yes / No                                                                                                                                                         |
| <b>Response to previous Anaesthetics/Surgery</b>                               |                                                                                                                                                                                                                                                                                                                                |
| <b>Mobility and function</b>                                                   | GMFCS level<br>GMFCS-equivalent level                                                                                                                                                                                                                                                                                          |
| <b>Tone and Movement Ds</b>                                                    | Spasticity: Yes / No<br>Dystonia: Yes / No<br>Management:<br>ITB: Yes / No<br>DBS: Yes / No                                                                                                                                                                                                                                    |
| <b>Pain</b>                                                                    | Signs of Pain:<br>Mx of pain:                                                                                                                                                                                                                                                                                                  |
| <b>Epilepsy/Seizures</b>                                                       | Type, frequency:<br>Management:<br>Ketogenic diet: Yes / No                                                                                                                                                                                                                                                                    |
| <b>Communication and Cognition</b>                                             | Communication:<br>School:                                                                                                                                                                                                                                                                                                      |
| <b>Mental health, behaviour, sensory issues</b>                                |                                                                                                                                                                                                                                                                                                                                |
| <b>Nutrition</b>                                                               | Nutritional Status:<br>Recent weight gain/loss:<br><br>Feeding:<br>Feed regime:<br><br>Vomiting: Yes / No<br>Reflux: Yes / No<br>Fundoplication: Yes / No<br>Constipation: Yes / No                                                                                                                                            |
| <b>Bone health</b>                                                             | History of insufficiency fracture: Yes / No<br>DEXA: Yes / No<br>Treatment - bisphosphonates: Yes / No                                                                                                                                                                                                                         |
| <b>Pubertal Status</b>                                                         | Pre/post-pubertal                                                                                                                                                                                                                                                                                                              |
| <b>Skin Health</b><br><b>Wound healing</b><br><b>History of pressure sores</b> |                                                                                                                                                                                                                                                                                                                                |

|                              |                                                                                                                             |
|------------------------------|-----------------------------------------------------------------------------------------------------------------------------|
| <b>Recent Investigations</b> | <b>Date completed</b><br>Haemoglobin:<br>Ferritin:<br>CRP:<br>Vitamin D:<br>CAB:<br>Radiology:<br>Oximetry:<br>Sleep Study: |
|------------------------------|-----------------------------------------------------------------------------------------------------------------------------|

#### Family/Guardian view

|                                                                                 |  |
|---------------------------------------------------------------------------------|--|
| <b>Family/child/adolescent goal for surgery</b> (anticipated outcomes/benefits) |  |
| <b>Family/child/adolescent concerns/thoughts about surgery</b>                  |  |

#### Results, Actions and Recommendations

|                                                           |                                                                                                                                                                   |
|-----------------------------------------------------------|-------------------------------------------------------------------------------------------------------------------------------------------------------------------|
| <b>Additional investigations and information required</b> | Request Medical records<br>Additional pre-operative investigations/assessments                                                                                    |
| <b>Recommendations pre surgery</b>                        | Pre-operative admission: Yes / No<br>Pre-operative plan:<br>Nasogastric tube intra-operatively: Yes / No<br>Elective PICU admission post-op recommended: Yes / No |
